# Supplementary material for: Geometry and evolution of the ecological niche in plant-associated microbes
Source: PubMed Central journal article supplement (PMC7289842; doi:10.1038/s41467-020-16778-5), 2020-06-11
Supplement: 41467_2020_16778_MOESM4_ESM.pdf [file 41467_2020_16778_MOESM4_ESM.pdf]

### **Description of Additional Supplementary Files**

File Name: Supplementary Data 1

Description: Species-biological process-cardinal temperature sample sizes for data presented in the Togahsi dataset.
